# Supplementary material for: ProCS15: a DFT-based chemical shift predictor for backbone and Cβ atoms in proteins
Source: PubMed Central journal article supplement (PMC4662583; doi:10.7717/peerj.1344), 2015-10-20
Supplement: peerj-03-1344-s001.pdf [file peerj-03-1344-s001.pdf]

# ProCS15 Supplementary material

August 23, 2015

Table 1: Overview Table. Column 0 is the central residue type in the tripeptide. Column 1 contains the grid spacing in the datafile. Column 2 is the size of the data files for a single atom type after data compression. Column 3 is the amount of initial generated samples. Column 4 is number of chemical shift data points after the geometry optimization and NMR calculations. Column 5 is the interpolation method used to interpolate the missing data points. Column 6 is the amino acid’s number of side chain angles in ProCS15.

| Amino Acid    | Spacing | Data file size | Samples | Data points | Interpolation | Side chain angles |
|---------------|---------|----------------|---------|-------------|---------------|-------------------|
| Glycine       | 1°      | 3.0 MB         | 361     | 344         | Cubic         | 0                 |
| Alanine       | 1°      | 3.0 MB         | 361     | 343         | Cubic         | 0                 |
| Proline       | 1°      | 3.0 MB         | 361     | 246         | Cubic         | 0                 |
| Serine        | 5°      | 9.0 MB         | 6859    | 6259        | Cubic         | 1                 |
| Cysteine      | 5°      | 9.0 MB         | 6859    | 6326        | Cubic         | 1                 |
| Valine        | 5°      | 9.0 MB         | 6859    | 5861        | Cubic         | 1                 |
| Threonine     | 20°     | 3.0 MB         | 130321  | 114464      | Nearest       | 2                 |
| Asparagine    | 20°     | 3.0 MB         | 130321  | 113566      | Nearest       | 2                 |
| Aspartic Acid | 20°     | 3.0 MB         | 130321  | 113790      | Nearest       | 2                 |
| Histidine     | 20°     | 3.0 MB         | 130321  | 110787      | Nearest       | 2                 |
| Isoleucine    | 20°     | 3.0 MB         | 130321  | 93722       | Nearest       | 2                 |
| Leucine       | 20°     | 3.0 MB         | 130321  | 97803       | Nearest       | 2                 |
| Phenylalanine | 20°     | 3.0 MB         | 130321  | 107570      | Nearest       | 2                 |
| Tryptophan    | 20°     | 3.0 MB         | 130321  | 101471      | Nearest       | 2                 |
| Tyrosine      | 20°     | 3.0 MB         | 130321  | 111975      | Nearest       | 2                 |
| Glutamine     | 20°     | 57.0 MB        | 143769  | 130134      | Nearest       | 3                 |
| Glutamic Acid | 20°     | 57.0 MB        | 144360  | 129638      | Nearest       | 3                 |
| Methionine    | 20°     | 57.0 MB        | 144341  | 129019      | Nearest       | 3                 |
| Arginine      | 20°     | 1.0 GB         | 360909  | 327057      | Nearest       | 4                 |
| Lysine        | 20°     | 1.0 GB         | 360909  | 326607      | Nearest       | 4                 |
